# Supplementary material for: Enhanced ROS scavenging and tissue adhesive abilities in injectable hydrogels by protein modification with oligoethyleneimine
Source: Royal Society of Chemistry journal article supplement (doi:10.1039/d3bm02065g), 2024-01-01
Supplement: d3bm02065g1.pdf [file d3bm02065g1.pdf]

## Supporting Information

# Enhanced ROS scavenging and tissue adhesive abilities in injectable hydrogels by protein modification with oligoethyleneimine

Debabrata Palai<sup>1</sup>, Miho Ohta<sup>1</sup>, Iga Cetnar<sup>1,2</sup>, Tetsushi Taguchi<sup>1\*</sup>, Akihiro Nishiguchi<sup>1\*</sup>

<sup>1</sup> Research Center for Macromolecules and Biomaterials, National Institute for Materials Science, Namiki 1-1, Tsukuba, Ibaraki 305-0044, Japan

<sup>2</sup> Faculty of Materials Science and Engineering, Warsaw University of Technology, Al. Waszyngtona 4/8 Warsaw, Poland

\*Corresponding author: [nishiguchi.akihiro@nims.go.jp](mailto:nishiguchi.akihiro@nims.go.jp), [taguchi.tetsushi@nims.go.jp](mailto:taguchi.tetsushi@nims.go.jp)

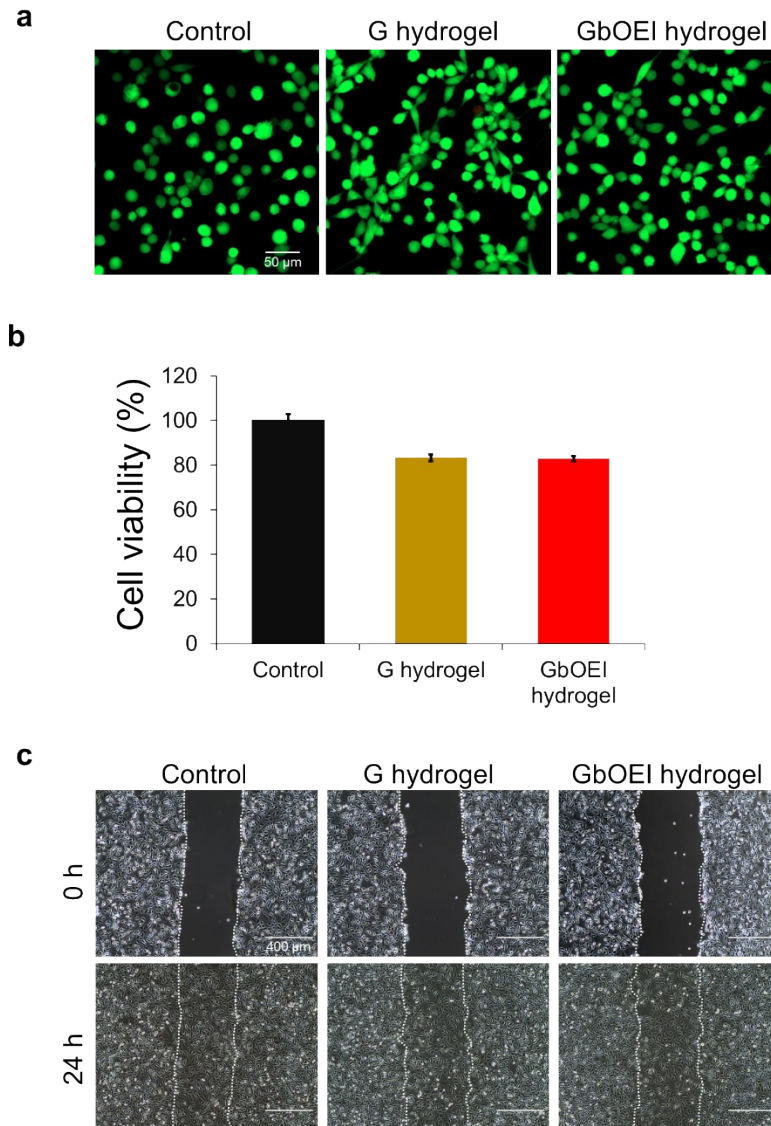

**Figure S1.** (a) Fluorescence microscopic images of live/dead assay of L929 cells. Each hydrogel (8 mm disc) was immersed in culture media for 24 h at 37 °C. The supernatants were collected and kept at -80 °C until the use. Cells were exposed to the supernatants for 24 h. (b) Cell viability of L929 cells exposed to G and GbOEI-2 hydrogels. (c) Phase contrast images of L929 cells in wound healing assay. A scratch was formed to confluent cultured L929 cells on 6 well plates using a pipettor. The medium or supernatant were added to the cells and cultured for 24 h.

**Table S1.** Comparison of adhesive strength, anti-inflammatory properties of different tissue adhesives.

| Adhesive                           | Biocompatibility | Adhesive strength<br>(kPa) | ROS scavenging ability | Ref                                                                                              |
|------------------------------------|------------------|----------------------------|------------------------|--------------------------------------------------------------------------------------------------|
| Fibrin glue                        | yes              | ~2                         | no                     | Nishiguchi, A. et al., <i>ACS Appl Bio Mater</i> 3, 9093–9100 (2020).                            |
| Duraseal                           | yes              | ~15                        | no                     | Komatsu, H. et al., <i>Macromol. Biosci.</i> 23, e2300097 (2023)                                 |
| 4arm-PEG crosslinked gel           | yes              | 13                         | no                     | Henise, J. et al., <i>J. Biomed. Mater. Res. B Appl. Biomater.</i> <b>105</b> , 1602–1611 (2017) |
| $\alpha$ -linolenic acid based gel | yes              | 6                          | yes                    | Mizuno, Y. et al., <i>ACS Appl. Bio Mater.</i> 3, 6204–6213 (2020)                               |
| GbOEI-2                            | yes              | 20                         | yes                    | -                                                                                                |

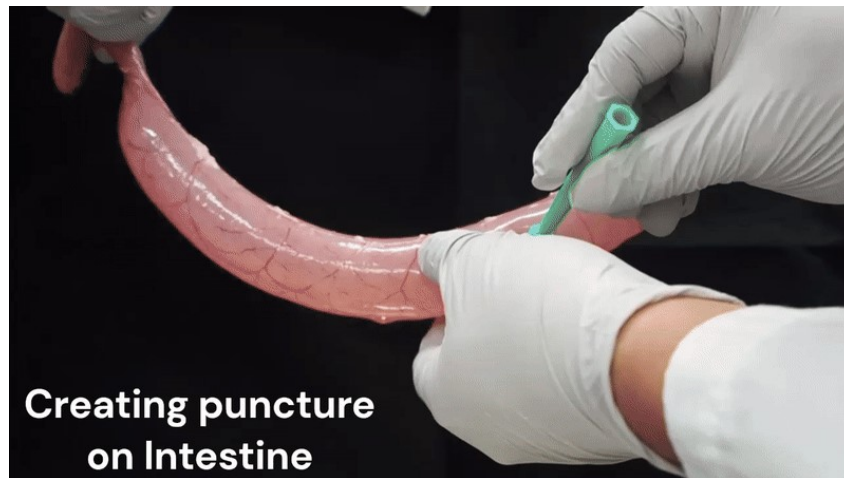

**Video S1.** In vivo tissue adhesive test of GbOEI hydrogel using small intestine of porcine.
